# Supplementary material for: Melatonin for the treatment of spinal cord injury
Source: PubMed Central journal article supplement — Neural Regen Res. 2018 Oct;13(10):1685–92. doi: 10.4103/1673-5374.238603 (PMC6128058; doi:10.4103/1673-5374.238603), 2018-10
Supplement: NRR-13-1685_Suppl1.pdf [file NRR-13-1685_Suppl1.pdf]

**Additional Table 1 Characteristics of the major studies.**

| <b>Study</b>                | <b>Animal</b>                           | <b>SCI Model</b>                 | <b>Experimental groups</b>                                                          | <b>Control groups</b>       | <b>Time of study</b>               | <b>Treatment (MT)</b>                           | <b>Biochemical outcomes</b>                | <b>Behavioral outcomes</b> | <b>Major findings and conclusions</b>                                                                    |
|-----------------------------|-----------------------------------------|----------------------------------|-------------------------------------------------------------------------------------|-----------------------------|------------------------------------|-------------------------------------------------|--------------------------------------------|----------------------------|----------------------------------------------------------------------------------------------------------|
| Shen et al. (2017)          | Female Sprague–Dawley rats<br>180–220 g | T <sub>9–10</sub><br>Weight-drop | SCI + MT<br>12.5 mg/kg,<br>i.p.                                                     | 1. Sham<br>2. SCI + vehicle | 0, 1, 3, 7,<br>14, 21, and<br>28 d | Each day<br>for 3 d                             | Bax,<br>caspase-3<br>Bcl-2                 | BBB                        | MT decreased SCI through activation of the Wnt/ $\beta$ catenin signaling pathway.                       |
| Yuan et al. (2016)          | Male C57BL/B6 mice<br>Eight-week-old    | T <sub>10</sub><br>Weight-drop   | SCI + MT<br>10 mg/kg<br>25 mg/kg<br>50 mg/kg<br>i.p.                                | 1. Sham<br>2. SCI + vehicle | 24 h, 48 h,<br>72 h, 7 d           | 30 min<br>after SCI                             | MDA, GSH,<br>GSSG and<br>MPO               | No                         | MT treatment plays a role in protecting the testes of SCI animals by preventing oxidative stress damage. |
| Krityakiarana et al. (2016) | Female mice<br>3 months old             | T <sub>12</sub><br>Compression   | SCI + MT<br>(single dose)<br>SCI + MT14<br>(14 d'<br>treatment)<br>10 mg/kg<br>i.p. | 1. Sham<br>2. SCI + vehicle | 1, 3, 5, 7,<br>10 and 14<br>d      | 10 min<br>after<br>lesion,<br>daily for<br>14 d | IL-1 $\beta$ and<br>NG-2                   | BMS                        | MT prevented scar formation through reducing inflammatory cytokines after SCI.                           |
| Jing et al. (2017)          | Female Sprague-Dawley rats<br>180–220 g | T <sub>10</sub><br>Weight-drop   | SCI + MT<br>10 mg/kg<br>i.p.                                                        | 1. Sham<br>2. SCI + vehicle | 7 d                                | 30 min<br>after SCI<br>for 7 d<br>twice daily   | BSCB,<br>BDNF,<br>Synapsin-I,<br>or GAP-43 | No                         | Improvement of microcirculation and decrease of neurological impairment may contribute to the            |

|                           |                                                      |                                               |                                                                                  |                                                       |                       |                                                               |                                                     |     |                                                                                                                                |
|---------------------------|------------------------------------------------------|-----------------------------------------------|----------------------------------------------------------------------------------|-------------------------------------------------------|-----------------------|---------------------------------------------------------------|-----------------------------------------------------|-----|--------------------------------------------------------------------------------------------------------------------------------|
| Paterniti et al. (2017)   | C57BL/6N<br>20–22 g<br>4–5 weeks old                 | T <sub>5-8</sub><br>Compressed                | SCI + MT<br>30 mg/kg<br>i.p.                                                     | 1. Sham<br>2. SCI + vehicle                           | 1–20 d                | 1, 6, and<br>12 h after<br>SCI                                | Neutrophil<br>infiltration,<br>NF-κB,<br>iNOS       | BMS | neuroprotective effects of melatonin.<br>The anti-inflammatory activity of MT is related to PPAR-α in SCI.                     |
| Gao et al. (2016)         | Male<br>Kunming white mice<br>40–45 g<br>8 weeks old | T <sub>6-10</sub><br>Weight-drop              | SCI + AEC (amniotic epithelial cells) treated by MT (0.01, 0.1, 1, 10 or 100 μM) | 1. Sham<br>2. SCI + PBS<br>3. SCI + neural cells      | 1-42 day post-injury  | Transplantation surgeries were performed at 6 d after surgery | Differentiation into neural cells<br>Tubb3 and GFAP | BBB | Co-treatment of MT and Wnt-4 improved the recovery of SCI and neural cell differentiation in bovine amniotic epithelial cells. |
| Aydemir et al. (2016)     | Wistar albino rats                                   | L <sub>3</sub><br>Clamping                    | SCI + MT<br>50 mg/kg<br>i.p.                                                     | 1. Sham<br>2. Sham + MT<br>3. SCI+vehicle             | 48 h                  | 10 min before the aorta was clamped                           | MDA,GSH, caspase-3                                  | No  | MT played a protection role after ischemia in rats.                                                                            |
| Liu et al. (2015)         | Male<br>Sprague–Dawley rats<br>205–225 g             | T <sub>12</sub><br>Compression                | SCI + MT<br>100 mg/kg<br>i.p.                                                    | 1. Sham<br>2. SCI + vehicle                           | 12, 24, 48 and 72 h   | immediately after injury and then daily for 2 d               | AQP4 ,<br>GFAP                                      | No  | MT may eliminate astrocytic swelling and anti-edema after acute SCI.                                                           |
| Haddadi and Fardid (2015) | Male<br>Wistar rats<br>180–220 g                     | C <sub>1</sub> -T <sub>2</sub><br>Irradiation | SCI + MT<br>100 mg/kg, 5 mg/kg                                                   | 1. Sham + vehicle<br>2. Sham + MT<br>3. SCI + vehicle | 3 w after irradiation | 100 mg/kg oral administration. 30 min later                   | TNF-α,<br>MDA                                       | No  | Administration of MT can inhibit TNF-α expression and prevent radiation-induced                                                |

|                             |                                                        |                                             |                                                                                         |                                                                              |                                          | exposed to radiation, 5 mg/kg of melatonin daily for 3 w |                                                                            |     | SCI.                                                                                                                      |
|-----------------------------|--------------------------------------------------------|---------------------------------------------|-----------------------------------------------------------------------------------------|------------------------------------------------------------------------------|------------------------------------------|----------------------------------------------------------|----------------------------------------------------------------------------|-----|---------------------------------------------------------------------------------------------------------------------------|
| Wu et al. (2014)            | Male C57BL/B6 mice<br>20–25 g                          | T <sub>10</sub><br>Weight-drop              | SCI + MT<br>5, 10, 25, 50<br>100 mg/kg/day<br>i.p.                                      | 1. Sham<br>2. SCI + vehicle                                                  | 48 h                                     | immediately after SCI                                    | BSCB permeability<br>MMP3,<br>AQP4,<br>HIF-1 $\alpha$ ,<br>VEGF,<br>VEGFR2 | No  | MT may stabilize the function of microvascular barrier and microcirculation of SCI by promoting recovery of damaged BSCB. |
| Tavukçu Hasan et al. (2014) | Male Wistar albino rats<br>250–300 g                   | T <sub>7–10</sub><br>Weight-drop:           | SCI + MT (10 mg/kg, i.p.),<br>SCI + MT (10 mg/kg, i.p.) +<br>tadalafil (10 mg/kg, p.o.) | 1. Sham + vehicle<br>2. SCI + vehicle<br>3. SCI + tadalafil (10 mg/kg, p.o.) | 7 d                                      | Post-SCI for 7 d                                         | Restored ED, caspase 3, NOS, MPO, SOD, cGMP, NGF, GSH                      | No  | The anti-oxidant effects of MT prevented the destroy of cavernosal tissues and promoted the recovery of ED.               |
| Piao et al. (2014)          | Female Sprague–Dawley rats<br>250–300 g<br>8 weeks old | T <sub>8,9</sub><br>Photo-thrombotic injury | SCI + MT<br>50 mg/kg<br>i.p.                                                            | 1. Sham<br>2. SCI + vehicle                                                  | 3 d after SCI and then once/week for 4 w | starting 1 h after injury and at 12 h intervals for 7 d  | MMP-2,<br>MMP-9                                                            | BBB | MT improved function by reducing the expression of MMP-9.                                                                 |
| Lee et al. (2014)           | Male Sprague–Dawley rats                               | T <sub>9,10</sub><br>Weight-drop            | SCI + MT<br>10 mg/kg<br>SCI + MT +                                                      | 1. Sham + vehicle<br>2. SCI + vehicle                                        | 1, 3, 7, 14, 21 d                        | Twice daily for 3 w                                      | eNSPCs,<br>MAP2,<br>GFAP                                                   | BBB | Cotreatment with MT and exercise might promote                                                                            |

|                       |                                            |                                             |                                          |                                                |                                                                 |                                               |                                                                        |                             |                                                                                                                         |
|-----------------------|--------------------------------------------|---------------------------------------------|------------------------------------------|------------------------------------------------|-----------------------------------------------------------------|-----------------------------------------------|------------------------------------------------------------------------|-----------------------------|-------------------------------------------------------------------------------------------------------------------------|
|                       | 250–270g                                   |                                             | Ex<br>s.c.                               |                                                |                                                                 |                                               |                                                                        |                             | regeneration of endogenous neural stem/progenitor cells after SCI.                                                      |
| Jing et al. (2014)    | Male<br>C57BL/6<br>18–22 g                 | T <sub>10</sub><br>Weight-drop              | SCI + MT<br>10 mg/kg<br>i.p.             | 1. Sham<br>2. SCI + vehicle                    | 2, 7, 10, 14<br>d                                               | Twice<br>daily for 2<br>w                     | BSCB<br>permeability<br>AQP4,<br>Ang1,<br>ICAM-1,<br>Bcl-2, and<br>Bax | BMS                         | MT improved the disruption of BSCB and blood vessels by increasing of pericyte coverage.                                |
| Akakin et al. (2013)  | Male<br>Wistar<br>albino rats<br>250–300 g | T <sub>7-10</sub><br>Weight drop            | SCI + MT<br>10 mg/kg/day                 | 1. Sham<br>2. SCI + vehicle                    | 7 d                                                             | Once daily<br>for 7 d                         | MDA,GSH,<br>oxidative<br>stress in the<br>rat kidney                   | No                          | MT decreased oxidative stress of kidney after SCI.                                                                      |
| Haddadi et al. (2013) | Male<br>Wistar rats<br>180–220 g           | C <sub>1</sub> -T <sub>2</sub><br>Radiation | SCI + MT<br>100 mg/kg<br>5 mg/kg<br>i.p. | 1. Sham +<br>vehicle<br>2. Sham + MT<br>3. SCI | 1, 3, 8, 16,<br>20 and 22<br>w after<br>radiation<br>treatment. | 100<br>mg/kg, 5<br>mg/kg<br>daily for<br>22 w | VEGF                                                                   | No                          | MT modulates the expression of VEGF and promotes survival of irradiated SCI animals.                                    |
| Erşahin et al. (2012) | Wistar<br>albino rats<br>250–300 g         | T <sub>7-10</sub><br>Weight drop            | SCI + MT<br>10 mg/kg/day,<br>i.p.        | 1. Sham<br>2. SCI + vehicle                    | 7 d                                                             | 15 min<br>post-injury<br>daily for 1<br>w     | MDA, GSH,<br>NGF,<br>caspase-3                                         | Motor<br>function<br>scores | MT reduced tissue injury and improved the bladder function by reducing oxidative stress and affecting the expression of |

|                        |                                                  |                                  |                                                                           |                                                                                 |                                            |                                                                        |                                                      |     |                                                                                                                                                                     |
|------------------------|--------------------------------------------------|----------------------------------|---------------------------------------------------------------------------|---------------------------------------------------------------------------------|--------------------------------------------|------------------------------------------------------------------------|------------------------------------------------------|-----|---------------------------------------------------------------------------------------------------------------------------------------------------------------------|
| Park et al. (2012)     | Male Sprague–Dawley rats<br>250–260 g            | T <sub>9-10</sub><br>Weight drop | SCI + MT<br>10 mg/kg<br>s.c.                                              | 1. Sham<br>2. SCI + vehicle                                                     | 1, 3, 7, 14,<br>21, 28 d                   | Twice<br>daily for<br>28 d                                             | iNOS,<br>GFAP,<br>MAFbx,<br>MuRF1                    | BBB | NGF.<br>MT could prevent acute inflammation and skeletal muscle atrophy.                                                                                            |
| Park et al. (2010)     | Male Sprague–Dawley rats<br>230–270 g<br>8 w old | T <sub>10</sub><br>Weight drop   | SCI + Ex + MT<br>10 mg/kg<br>s.c.                                         | 1. SCI<br>2. SCI + Ex                                                           | 1, 3, 7, 14,<br>21, 28 d<br>after injury   | twice daily<br>for 4 w                                                 | iNOS,<br>Beclin-1,<br>LC3, p53,<br>IKK $\alpha$      | BBB | Cotreatment with MT and exercise decreased the secondary damage of SCI rats.<br>Combined therapy may reduce the side effects including fatigue induced by exercise. |
| Nesic et al. (2008)    | Male Sprague–Dawley rats<br>225–250 g            | T <sub>10</sub><br>Weight drop   | SCI + MT<br>10 mg/kg<br>i.p.                                              | 1. Sham<br>2. SCI + vehicle                                                     | 1–35 d                                     | Once daily<br>for 35 d                                                 | AQP1                                                 | BBB | MT treatment is related to the decreased AQP4 level and reduced mechanical allodynia in SCI animals.                                                                |
| Genovese et al. (2007) | Mice                                             | T <sub>6-7</sub><br>Compression  | 1.SCI + MT<br>2.SCI + MT + dexamethasone<br>MT: 10 mg/kg<br>dexamethasone | 1. SCI + vehicle<br>2. SCI + dexamethasone<br>3. Sham + vehicle<br>4. Sham + MT | Once daily<br>for 10 d<br>after<br>injury. | dexamethasone +<br>melatonin<br>1 h and 4 h<br>after SCI,<br>and daily | Bax, Bcl-2,<br>TNF- $\alpha$ ,<br>iNOS<br>Fas Ligand | BBB | Cotreatment MT with dexamethasone decreased secondary damage of SCI mice and                                                                                        |

|                           |                                   |                                  |                               |                                                      |         |                      |                     |                            |                                                                                                                             |
|---------------------------|-----------------------------------|----------------------------------|-------------------------------|------------------------------------------------------|---------|----------------------|---------------------|----------------------------|-----------------------------------------------------------------------------------------------------------------------------|
|                           |                                   |                                  | e: 0.025 mg/kg<br>i.p.        | +                                                    |         | until day 9          |                     |                            | MT reduced<br>the side effects of<br>steroids.                                                                              |
| Erol et al.<br>(2008)     | Male<br>Wistar rats<br>200–250g   | T <sub>4-5</sub><br>Compression  | SCI + MT<br>7.5 mg/kg<br>i.p. | 1. Sham<br>2. SCI + saline<br>3. SCI +<br>octreotide | 1, 10 d | each day<br>for 10 d | MDA, SOD,<br>GSH-Px | No                         | MT is more<br>effective than<br>octreotide in<br>preventing<br>secondary damage<br>of SCI animals                           |
| Cayli<br>et al.<br>(2004) | Female<br>albino rats<br>200–250g | T <sub>7-10</sub><br>Weight drop | SCI + MT<br>10 mg/kg<br>i.p.  | 1. Sham<br>2. SCI + vehicle                          | 1–10 d  | 4 h, 24 h,<br>10 d   | MDA                 | Motor<br>function<br>scale | MP, MT, used<br>either alone or in<br>combination,<br>exerted similar<br>effects in<br>promoting<br>functional<br>recovery. |

T: Thoracic vertebrae; C: cervical spine; L: lumbar vertebrae; SCI: spinal cord injury; MT: melatonin; i.p.: intraperitoneal; s.c.: subcutaneous; Bax: Bcl-2 associated X protein; Bcl-2: B-cell lymphoma-2; MDA: malondialdehyde; GSH: glutathione; BBB: Basso: Beattie: and Bresnahan; BMS: Basso Mouse Scale; GSSG: glutathione (oxidized form); MPO: myeloperoxidase; IL-1 $\beta$ : interleukin-1 $\beta$ ; NG-2: neural/glia antigen 2; BSCB: blood-spinal cord barrier; BDNF: brain-derived neurotrophic factor; NF- $\kappa$ B: nuclear factor  $\kappa$ B; iNOS: inducible nitric oxide synthase; GAP-43: growth-associated protein-43; Tubb3 tubulin beta3 class III; GFAP: glial fibrillary acidic protein; TNF- $\alpha$ : tumor necrosis factor  $\alpha$ ; AQP4: Aquaporin 4; GFAP: glial fibrillary acidic protein; MMP3: matrix metalloproteinase-3; HIF-1 $\alpha$ : hypoxia inducible factor  $\alpha$ ; VEGF: vascular endothelial growth factor; VEGFR2: vascular endothelial growth factor receptor 2; eNSPCs: endogenous neural stem/progenitor cells; MAP2: microtubule-associated protein 2; MPO: myeloperoxidase; SOD: superoxide dismutase; NGF: nerve growth factor; GSH: L-glutathione; Ang1: angiopoietin 1; ICAM-1: intercellular adhesion molecule 1; MAFbx: including muscle atrophy F-box; MuRF1: muscle-specific ring-finger protein 1; IKK $\alpha$ : inhibitor of nuclear factor kappa-B; d day(s); h: hours; min: minutes; w: week(s).
