# Supplementary material for: Melatonin for the treatment of spinal cord injury
Source: PubMed Central journal article supplement — Neural Regen Res. 2018 Oct;13(10):1685–92. doi: 10.4103/1673-5374.238603 (PMC6128058; doi:10.4103/1673-5374.238603), 2018-10
Supplement: NRR-13-1685_Suppl2.pdf [file NRR-13-1685_Suppl2.pdf]

**Open peer review report 1**

**Reviewer:** Stephanie K Seidlits, University of California Los Angeles, USA.

**Comments to the authors:**

The manuscript is a thorough and focused review of the potential of melatonin as a therapy to attenuate damage from secondary injury after spinal cord injury (SCI). Although this is a bit of a "niche" topic, there is enough variability in the literature and findings across different biological systems to make this interesting for researchers in neural recreation. I recommend acceptance after minor corrects by the authors.

The manuscript is a thorough and focused review of the potential of melatonin as a therapy to attenuate damage from secondary injury after spinal cord injury (SCI). Although this is a bit of a "niche" topic, there is enough variability in the literature and findings across different biological systems to make this an interesting topic for researchers in neural regeneration. There are a few minor errors/comments:

Figure 1 - I suggest changing the text "Repairing of the damaged BSCB" to "Repair of the damaged BSCB" to keep consistent tense use within the figure.

While Table 1 does a thorough job of summarizing methods of several studies, results are not indicated. This would be useful info to add a column summarizing the key findings from each study..

Pg 6, line 10 - "injection" should be the plural "injections"

The article only contains a single figure. Most reviews and other articles have at least 2 figures.
